# Supplementary material
Source: publisher site journal article supplement (https://www.dovepress.com/article/357829)
Supplement: Supplementary file 1 [file get_supplementary_file.php]

**Supplementary materials**

**Supplementary Figure 1. Map showing the location of the participating sites for the Liverpool-Heart and bRain Project (L-HARP) which had opened recruitment or were processing local approvals prior to opening recruitment.**


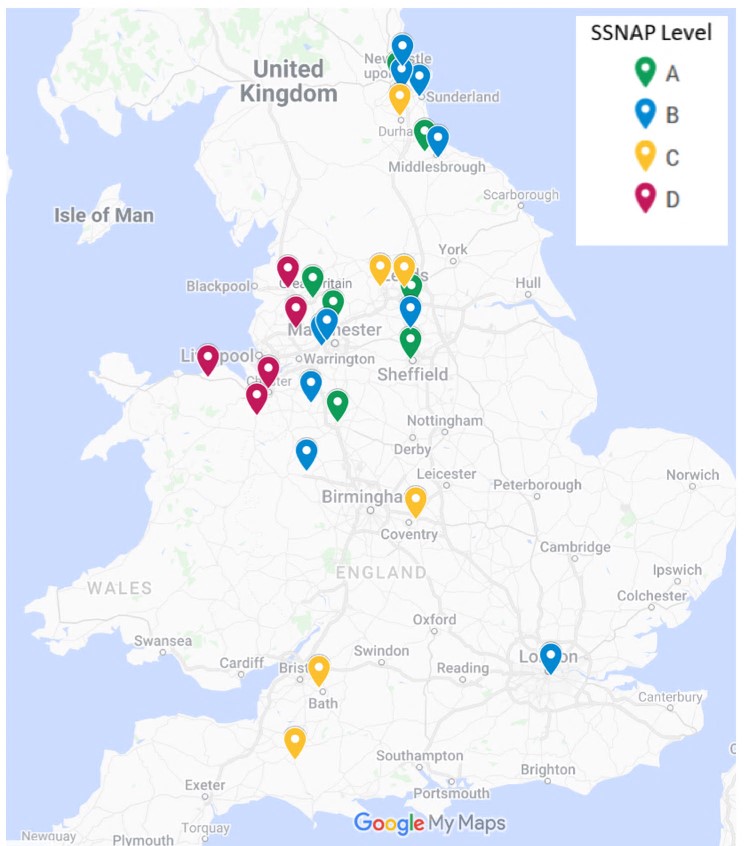


SSNAP: Sentinel Stroke National Audit Programme scores hospitals from (A-E) based on performance across 44 key indicators of care. A = First class service, B = Good or excellent in many aspects, C = Reasonable overall - some areas require improvement, D = Several areas require improvement. Based on the July-September 2021 SSNAP performance tables.

**Map data © 2022 GeoBasis-DE/BKG (© 2009), Google,** Instituto Geográfico Nacional**.** Available from: https://mymaps.google.com/. Accessed March 1, 2022.

**Supplementary Table 1.** Overview of data to be collected at baseline and follow-up.

| **Variable**  **(questionnaire used if applicable)** | **Collected at Baseline** | **Collected at Follow-up** |
| --- | --- | --- |
| Demographic statistics e.g. age, sex, height, weight | X |  |
| Blood pressure | X |  |
| Diagnosed medical conditions | X | X |
| Cardiovascular history | X | X |
| Prescribed medications | X | X |
| Blood sample results including cholesterol levels, triglycerides, blood glucose, haemoglobin, white cell count, serum creatinine* | X |  |
| Electrocardiogram (ECG) image and results* | X |  |
| Echocardiogram results* | X |  |
| Stroke severity  (National Institutes of Health Stroke Scale: NIHSS)1 | X |  |
| Degree of disability after stroke  (Modified Rankin Scale)2 | X |  |
| Functional independence  (Barthel Index)3 | X | X |
| Cognitive function  (Montreal Cognitive Assessment: MoCA)4 | X | X |
| Fatigue  (Fatigue Assessment Scale)5 | X | X |
| Depression  (Patient Health Questionnaire: PHQ-9)6 | X | X |
| Anxiety  (General Anxiety Disorder: GAD-7)7 | X | X |
| Quality of life  (EQ-5D-5L without the visual analogue scale)8 | X | X |

*Data only collected if the procedure is completed as part of usual care.

**Supplementary Table 2.** Risk prediction models for atrial fibrillation which will be examined in the Liverpool-Heart And bRain Project (L-HARP).

| **Risk model** | **Variables included in the model** |
| --- | --- |
| C2HEST9 | Age (≥75 years old), coronary artery disease, chronic obstructive pulmonary disease, hypertension, systolic heart failure, hyperthyroidism. |
| Atherosclerosis Risk in Communities (ARIC)10 | Age, black race, height, systolic blood pressure, hypertension medication use, smoking status, precordial murmur, left atrial enlargement, left ventricular hypertrophy, diabetes mellitus, heart failure, coronary heart disease. |
| Cohorts for Heart and Aging Research in Genomic Epidemiology (CHARGE)-atrial fibrillation (AF)11 | Age, white race, height, weight, blood pressure, current smoker, hypertension treatment, Type 2 diabetes, heart failure, myocardial infarction, left ventricular hypertrophy, PR Interval. |
| Framingham Heart Study12 | Age, systolic blood pressure, hypertension treatment, body mass index, PR Interval, significant murmur, heart failure. |
| HAVOC score13 | Age (≥75 years old), hypertension, valvular heart disease, peripheral vascular disease, obesity, congestive heart failure, coronary artery disease. |
| HATCH score14 | Age (>75 years old), hypertension, stroke or transient ischaemic attack, chronic obstructive pulmonary disease and heart failure. |

**Supplementary references**

1. Lyden P, Lu M, Jackson C, et al. Underlying structure of the National Institutes of Health Stroke Scale: results of a factor analysis. NINDS tPA Stroke Trial Investigators. *Stroke.* 1999;30(11):2347-2354.

2. van Swieten JC, Koudstaal PJ, Visser MC, Schouten HJ, van Gijn J. Interobserver agreement for the assessment of handicap in stroke patients. *Stroke.* 1988;19(5):604-607.

3. Collin C, Wade DT, Davies S, Horne V. The Barthel ADL Index: a reliability study. *Int Disabil Stud.* 1988;10(2):61-63.

4. Nasreddine ZS, Phillips NA, Bédirian V, et al. The Montreal Cognitive Assessment, MoCA: a brief screening tool for mild cognitive impairment. *J Am Geriatr Soc.* 2005;53(4):695-699.

5. Cumming TB, Mead G. Classifying post-stroke fatigue: Optimal cut-off on the Fatigue Assessment Scale. *J Psychosom Res.* 2017;103:147-149.

6. Kroenke K, Spitzer RL, Williams JB. The PHQ-9: validity of a brief depression severity measure. *J Gen Intern Med.* 2001;16(9):606-613.

7. Spitzer RL, Kroenke K, Williams JB, Löwe B. A brief measure for assessing generalized anxiety disorder: the GAD-7. *Arch Intern Med.* 2006;166(10):1092-1097.

8. Herdman M, Gudex C, Lloyd A, et al. Development and preliminary testing of the new five-level version of EQ-5D (EQ-5D-5L). *Qual Life Res.* 2011;20(10):1727-1736.

9. Li YG, Bisson A, Bodin A, et al. C2HEST Score and Prediction of Incident Atrial Fibrillation in Poststroke Patients: A French Nationwide Study. *Journal of the American Heart Association.* 2019;8(13):e012546.

10. Chamberlain AM, Agarwal SK, Folsom AR, et al. A clinical risk score for atrial fibrillation in a biracial prospective cohort (from the Atherosclerosis Risk in Communities [ARIC] study). *Am J Cardiol.* 2011;107(1):85-91.

11. Alonso A, Krijthe BP, Aspelund T, et al. Simple risk model predicts incidence of atrial fibrillation in a racially and geographically diverse population: the CHARGE-AF consortium. *J Am Heart Assoc.* 2013;2(2):e000102.

12. Schnabel RB, Sullivan LM, Levy D, et al. Development of a risk score for atrial fibrillation (Framingham Heart Study): a community-based cohort study. *Lancet.* 2009;373(9665):739-745.

13. Kwong C, Ling AY, Crawford MH, Zhao SX, Shah NH. A Clinical Score for Predicting Atrial Fibrillation in Patients with Cryptogenic Stroke or Transient Ischemic Attack. *Cardiology.* 2017;138(3):133-140.

14. Suenari K, Chao TF, Liu CJ, Kihara Y, Chen TJ, Chen SA. Usefulness of HATCH score in the prediction of new-onset atrial fibrillation for Asians. *Medicine (Baltimore).* 2017;96(1):e5597.
